# Supplementary material for: Preoperative prognostic nutritional index predicts postoperative surgical site infections in gastrointestinal fistula patients undergoing bowel resections
Source: PubMed Central journal article supplement (PMC5058827; doi:10.1097/md.0000000000004084), 2016-07-08
Supplement: medi-95-e4084-s001.pdf [file medi-95-e4084-s001.pdf]

**Supplementary Table 1.** Postoperative Complications

| <b>Postoperative complications</b>                | <b>Number</b>    |
|---------------------------------------------------|------------------|
| <b>Surgical site infections, n (%)</b>            | <b>99(78.0%)</b> |
| Incisional infection                              | 54               |
| Deep incisional infection                         | 13               |
| Organ/space infection                             | 32               |
| <b>Other than surgical site infections, n (%)</b> | <b>28(22.0%)</b> |
| Inflammatory ileus                                | 9                |
| Bleeding                                          | 6                |
| Cardiac problems                                  | 2                |
| Urinary tract infection                           | 2                |
| Pneumonia                                         | 2                |
| Acute liver injury                                | 1                |
| CRBSI                                             | 1                |
| Hydrothorax                                       | 1                |
| Cholestasis cholecystitis                         | 1                |
| Deep vein thrombosis                              | 1                |
| Acute kidney injury                               | 1                |
| Phlebitis                                         | 1                |
| <b>Total</b>                                      | <b>127</b>       |

CRBSI: Catheter Related Blood Stream Infection
